# Supplementary material for: Breast-Cancer Stromal Cells withTP53Mutations
Source: Atypon-hosted journal article supplement (doi:10.1056/nejmc086024), 2008-04-09
Supplement: nejm_patocs_1634sa1.pdf [file nejm_patocs_1634sa1.pdf]

## Supplementary Appendix

This appendix has been provided by the authors to give readers additional information about their work.

Supplement to: Patocs A, Platzer P, Eng C. Breast-cancer stromal cells with *TP53* mutations. N Engl J Med 2008;358:1634-6.

Table 1. Routine quality control (QC) protocol and outcome

| Quality Control Steps                                                                                                                                            | Results of QC Testing for Patocs et al. 2007 Study                                                                                                            | Theoretical Results If QC Fails                                                                    |
|------------------------------------------------------------------------------------------------------------------------------------------------------------------|---------------------------------------------------------------------------------------------------------------------------------------------------------------|----------------------------------------------------------------------------------------------------|
| Analysis of archivally-derived germline DNA for <i>TP53</i> mutations when <i>TP53</i> mutation/variant found in somatic DNA (either epithelium and/or stroma)   | No <i>TP53</i> mutation in corresponding germline DNA for all samples with somatic mutations**. Only known polymorphisms of <i>TP53</i> noted in germline DNA | >5% with random <i>TP53</i> mutation and variation                                                 |
| Random selection of 10-20% of tested samples with mutations. Blinded repeat mutation analysis from corresponding LCM-procured frozen samples                     | 100% Concordance for mutations and LOH between archived template and corresponding frozen template                                                            | <90% Concordance for mutations and LOH between archived template and corresponding frozen template |
| Random selection of another 10-20% of study samples and subject to mutation analysis of <i>SDHB</i> *                                                            | No <i>SDHB</i> mutations found in germline, epithelium and stromal DNA from all tested samples (except for known polymorphisms)                               | ≥10% with <i>SDHB</i> mutations and variants not previously described                              |
| Select subset (in this study, 14 samples) with stromal <i>TP53</i> mutations subjected to re-LCM and DNA extraction by third party for blinded mutation analysis | 100% Concordance                                                                                                                                              | <90% Concordance                                                                                   |
| Two PCR-based technologies for mutation detection                                                                                                                | 100% Concordance: denaturing gradient gel electrophoresis and direct sequencing                                                                               | <90% Concordance                                                                                   |
| Non-PCR-based technology                                                                                                                                         | Immunohistochemistry – see Patocs et al. 2007<br>Chromosome in-situ hybridization <sup>+</sup>                                                                | N/A                                                                                                |

\**SDHB* has 8 exons (to match the 6 exons examined in *TP53*) but not known to play a somatic role in breast cancer

\*\* Literature suggests that there may be a <2% likelihood of finding an unexpected germline *TP53* mutation (ie occult Li-Fraumeni syndrome) in series of all comers with breast cancers

<sup>+</sup>Chromosome in-situ hybridization only detects deletions of a certain minimal length
